# Supplementary material for: Model of Anisotropic Reverse Cardiac Growth in Mechanical Dyssynchrony
Source: PubMed Central journal article supplement (PMC6722088; doi:10.1038/s41598-019-48670-8), 2019-09-03

# **Model of Anisotropic Reverse Cardiac Growth in Mechanical Dyssynchrony**

Jayavel Arumugam<sup>1</sup>, Joy Mojumder<sup>1</sup>, Ghassan Kassab<sup>2</sup>, Lik Chuan Lee<sup>1</sup>

<sup>1</sup>Department of Mechanical Engineering, Michigan State University, East Lansing, USA

<sup>2</sup>California Medical Innovations Institute, San Diego, CA, USA

## Appendix

| Short-term cardiac mechanics model parameters |       |                                    |                                                    |
|-----------------------------------------------|-------|------------------------------------|----------------------------------------------------|
| Parameter                                     | Value | Units                              | Comments                                           |
| $C$                                           | 0.132 | kPa                                | Exponential stiffness scaling factor               |
| $b_f$                                         | 29.0  | --                                 | Fiber stiffness factor                             |
| $b_{fs}$                                      | 13.3  | --                                 | Transverse fiber stiffness                         |
| $b_{xx}$                                      | 26.6  | --                                 | Transverse fiber shear stiffness                   |
| $k_{spring1}$                                 | 0.50  | kPa                                | Spring constant                                    |
| $k_{spring2}$                                 | 0.050 | kPa                                | Spring constant                                    |
| $T_{max}$                                     | 175.2 | kPa                                | Contractility                                      |
| $C_{a0}$                                      | 4.35  | $\mu\text{M}$                      | Peak intracellular calcium concentration           |
| $(C_{a0})_{max}$                              | 4.35  | $\mu\text{M}$                      | Maximum peak intracellular calcium concentration   |
| $B$                                           | 5.75  | $\mu\text{M}^{-1}$                 | Controls peak isometric tension-sarcomere relation |
| $l_0$                                         | 1.58  | $\mu\text{M}$                      | Sarcomere length at which no tension develops      |
| $l_{s0}$                                      | 1.85  | $\mu\text{M}$                      | Reference sarcomere length                         |
| $t_0$                                         | 250   | ms                                 | Time to maximum active tension                     |
| $m$                                           | 290   | $\text{ms} \cdot \mu\text{M}^{-1}$ | Controls sarcomere length-dependent relaxation     |
| $b$                                           | -275  | ms                                 | Controls sarcomere length-dependent relaxation     |

| Long-term cardiac mechanics model parameters |       |       |                                         |
|----------------------------------------------|-------|-------|-----------------------------------------|
| Parameter                                    | Value | Units | Comments                                |
| $C$                                          | 0.1   | kPa   | Exponential stiffness scaling factor    |
| $b_f$                                        | 29.0  | --    | Fiber stiffness factor                  |
| $b_{fs}$                                     | 13.3  | --    | Transverse fiber stiffness factor       |
| $b_{xx}$                                     | 26.6  | --    | Transverse fiber shear stiffness factor |
| $k_{spring1}$                                | 0.100 | kPa   | Spring constant                         |
| $n_{growthSteps}$                            | 15    | --    | Number of growth steps across 2 months  |

| <b>Cardiac electrophysiology model parameters</b> |              |                              |                                    |
|---------------------------------------------------|--------------|------------------------------|------------------------------------|
| <b>Parameter</b>                                  | <b>Value</b> | <b>Units</b>                 | <b>Comments</b>                    |
| $d_{iso}$                                         | 0.15         | $\text{cm}^2.\text{ms}^{-1}$ | Myocardial conduction              |
| $d_{ani}$                                         | 0.7          | $\text{cm}^2.\text{ms}^{-1}$ | Conduction along myofiber          |
| $c$                                               | 8            | --                           | Controls action potential dynamics |
| $\alpha$                                          | 0.01         | --                           | Controls action potential dynamics |
| $b$                                               | 0.15         | --                           | Controls action potential dynamics |
| $\gamma$                                          | 0.002        | --                           | Controls cardiac restitution       |
| $\mu_1$                                           | 0.2          | --                           | Controls cardiac restitution       |
| $\mu_2$                                           | 0.3          | --                           | Controls cardiac restitution       |

| <b>Windkessel model parameters</b> |              |                                      |                                  |
|------------------------------------|--------------|--------------------------------------|----------------------------------|
| <b>Parameter</b>                   | <b>Value</b> | <b>Units</b>                         | <b>Comments</b>                  |
| $P_{aor}$                          | 60           | mmHg                                 | Aortic valve opening pressure    |
| $P_{pul}$                          | 12           | mmHg                                 | Pulmonary valve opening pressure |
| $P_{mv}$                           | 5            | mmHg                                 | Mitral valve opening pressure    |
| $P_{tr}$                           | 4            | mmHg                                 | Tricuspid valve opening pressure |
| $C_{aor}$                          | 0.007        | ml.Pa                                | Aortic compliance                |
| $C_{pul}$                          | 0.01         | ml.Pa                                | Pulmonary compliance             |
| $R_{pul}$                          | 6e4          | $\text{Pa}.\text{ms}.\text{ml}^{-1}$ | Pulmonary peripheral resistance  |
| $R_{sys}$                          | 1e5          | $\text{Pa}.\text{ms}.\text{ml}^{-1}$ | Systemic peripheral resistance   |
| $R_{aor}$                          | 5.5e3        | $\text{Pa}.\text{ms}.\text{ml}^{-1}$ | Aortic resistance                |
| $R_{pa}$                           | 5e2          | $\text{Pa}.\text{ms}.\text{ml}^{-1}$ | Pulmonary artery resistance      |
| $P_{psys}$                         | 0.6          | kPa                                  | Peripheral systemic pressure     |
| $P_{ppul}$                         | 0.2          | kPa                                  | Pulmonary terminal pressure      |

**Additional Simulation of LVFW pacing using same forward rates in reverse direction but different rates in fiber and cross-fiber directions:**

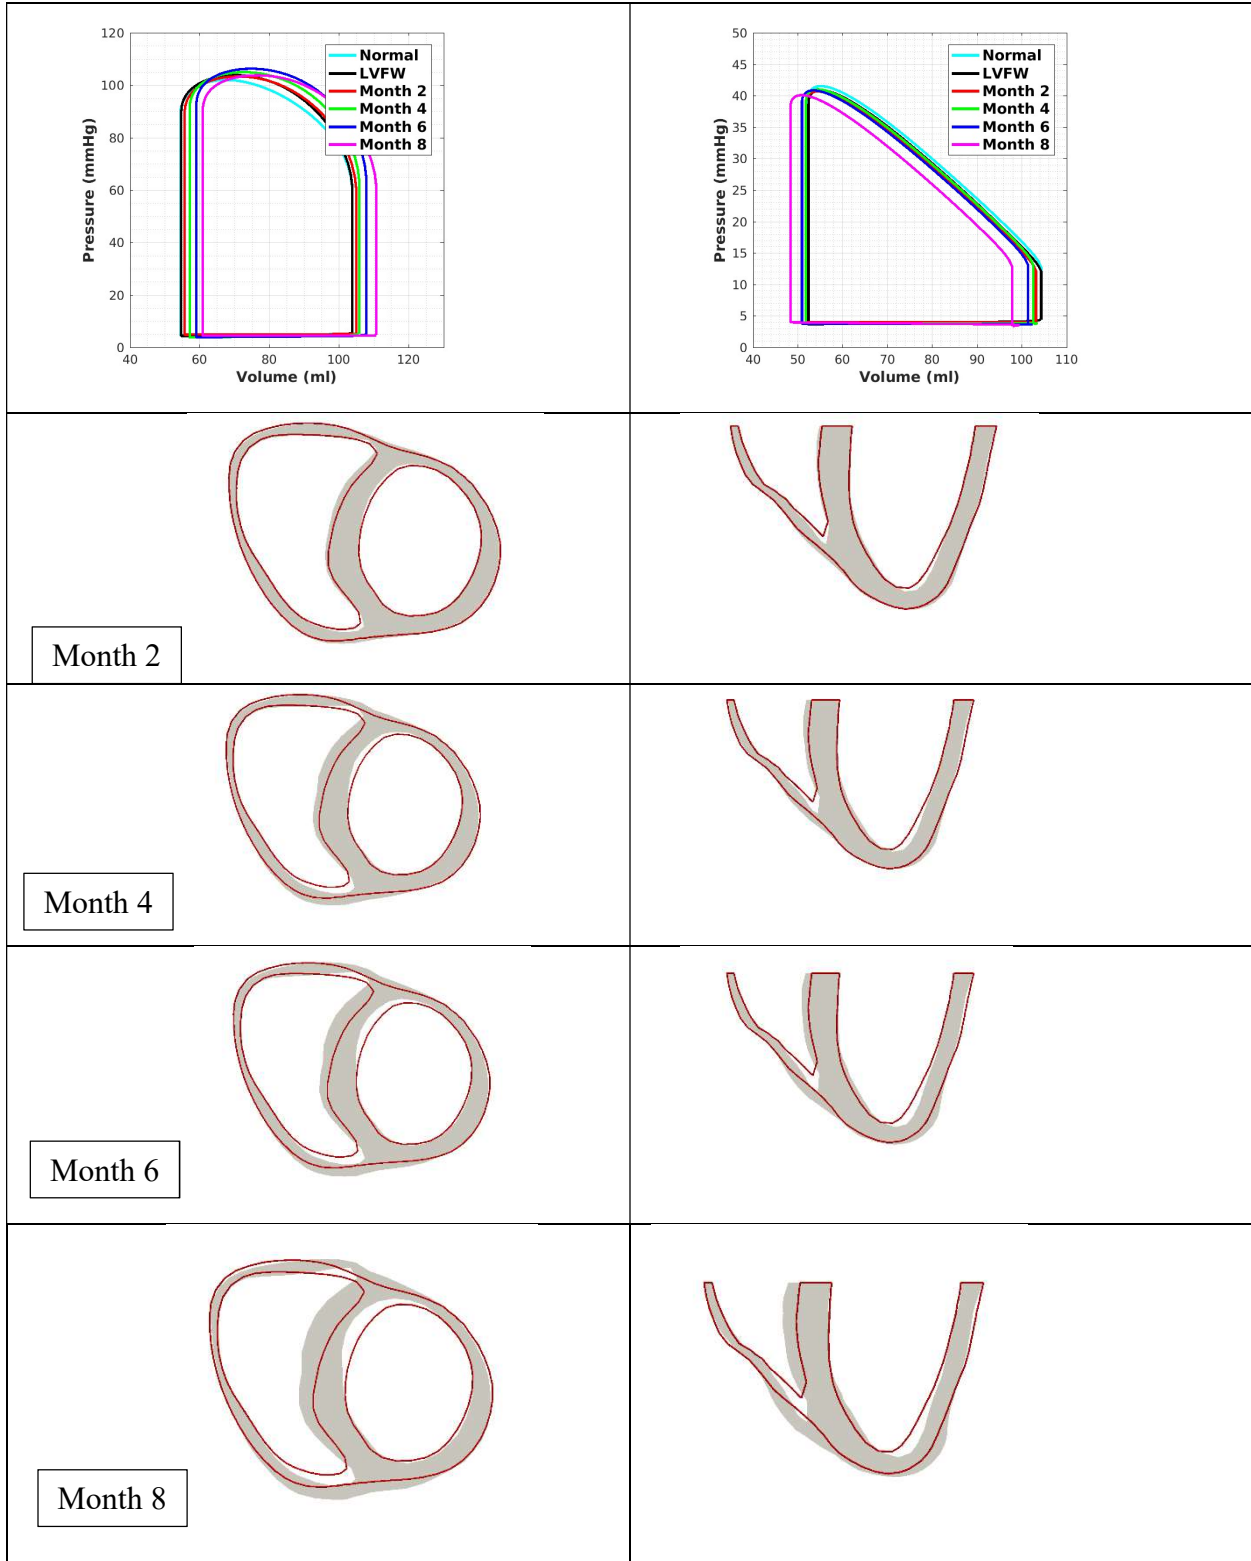

### Additional Simulations of Pressure Overload

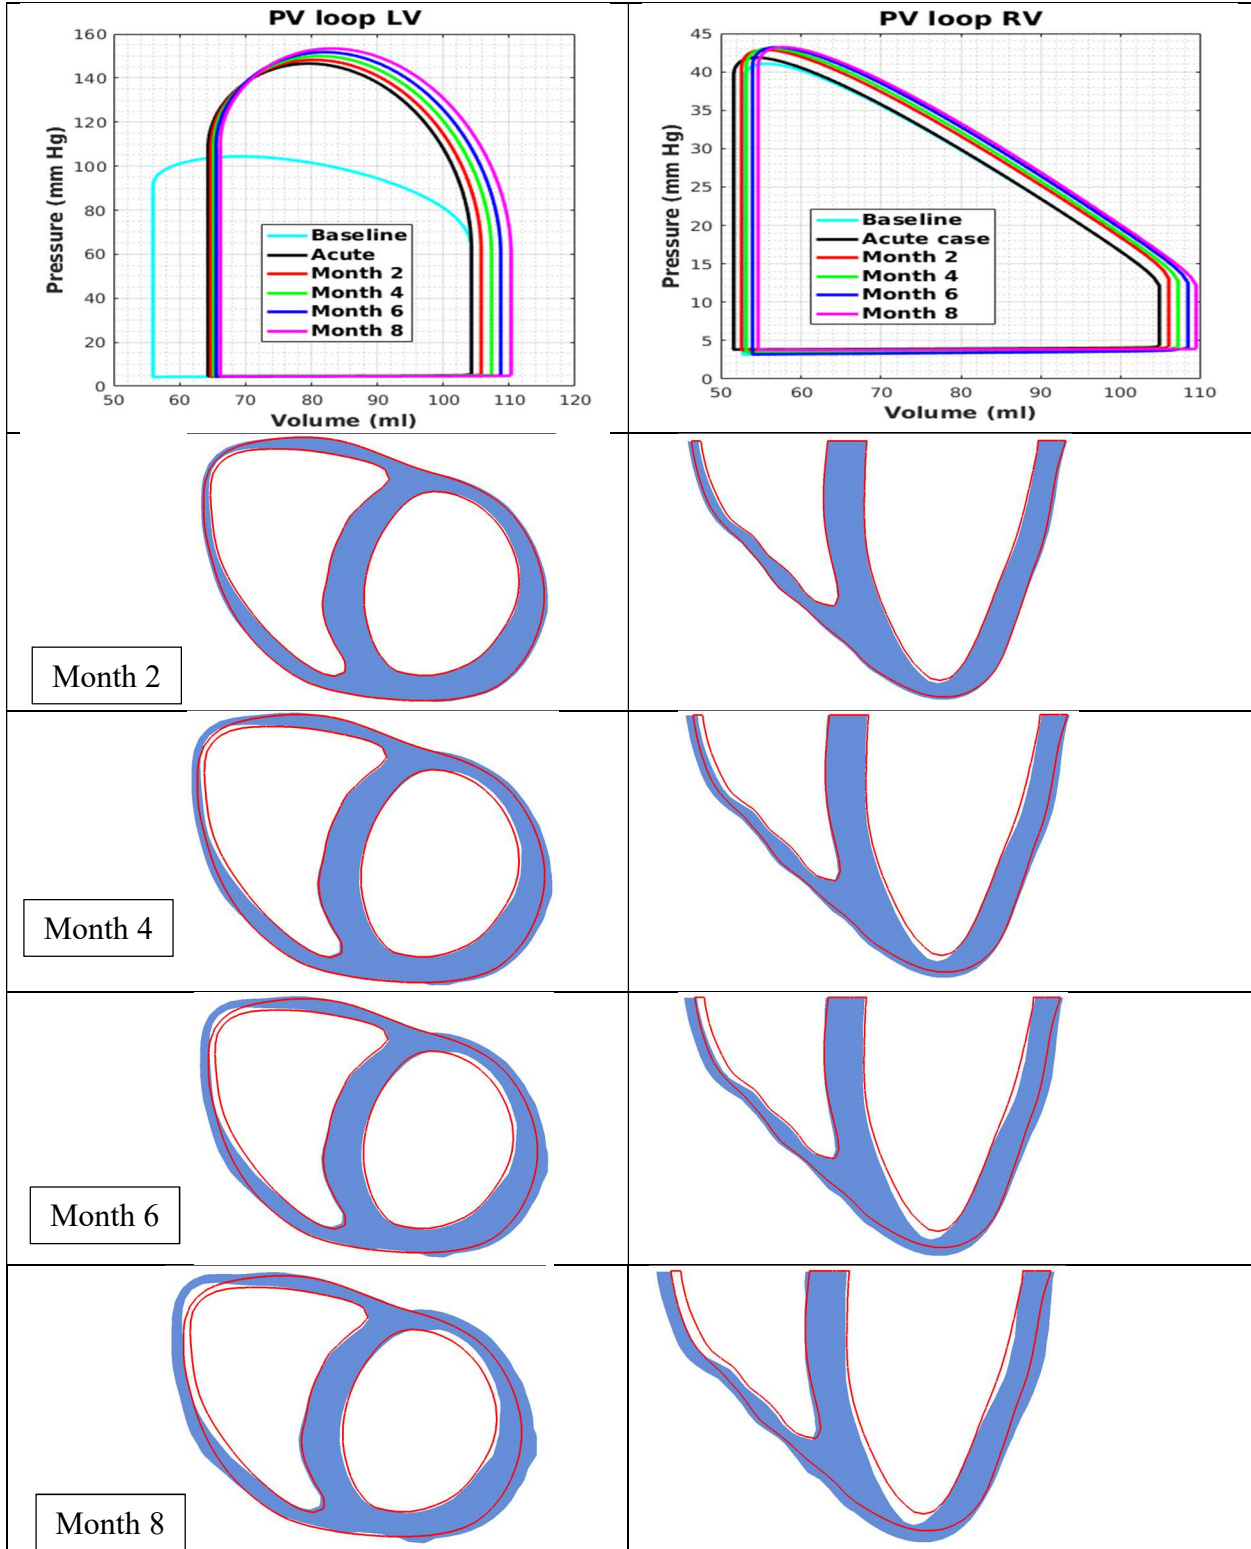

### Additional Simulations of Volume Overload

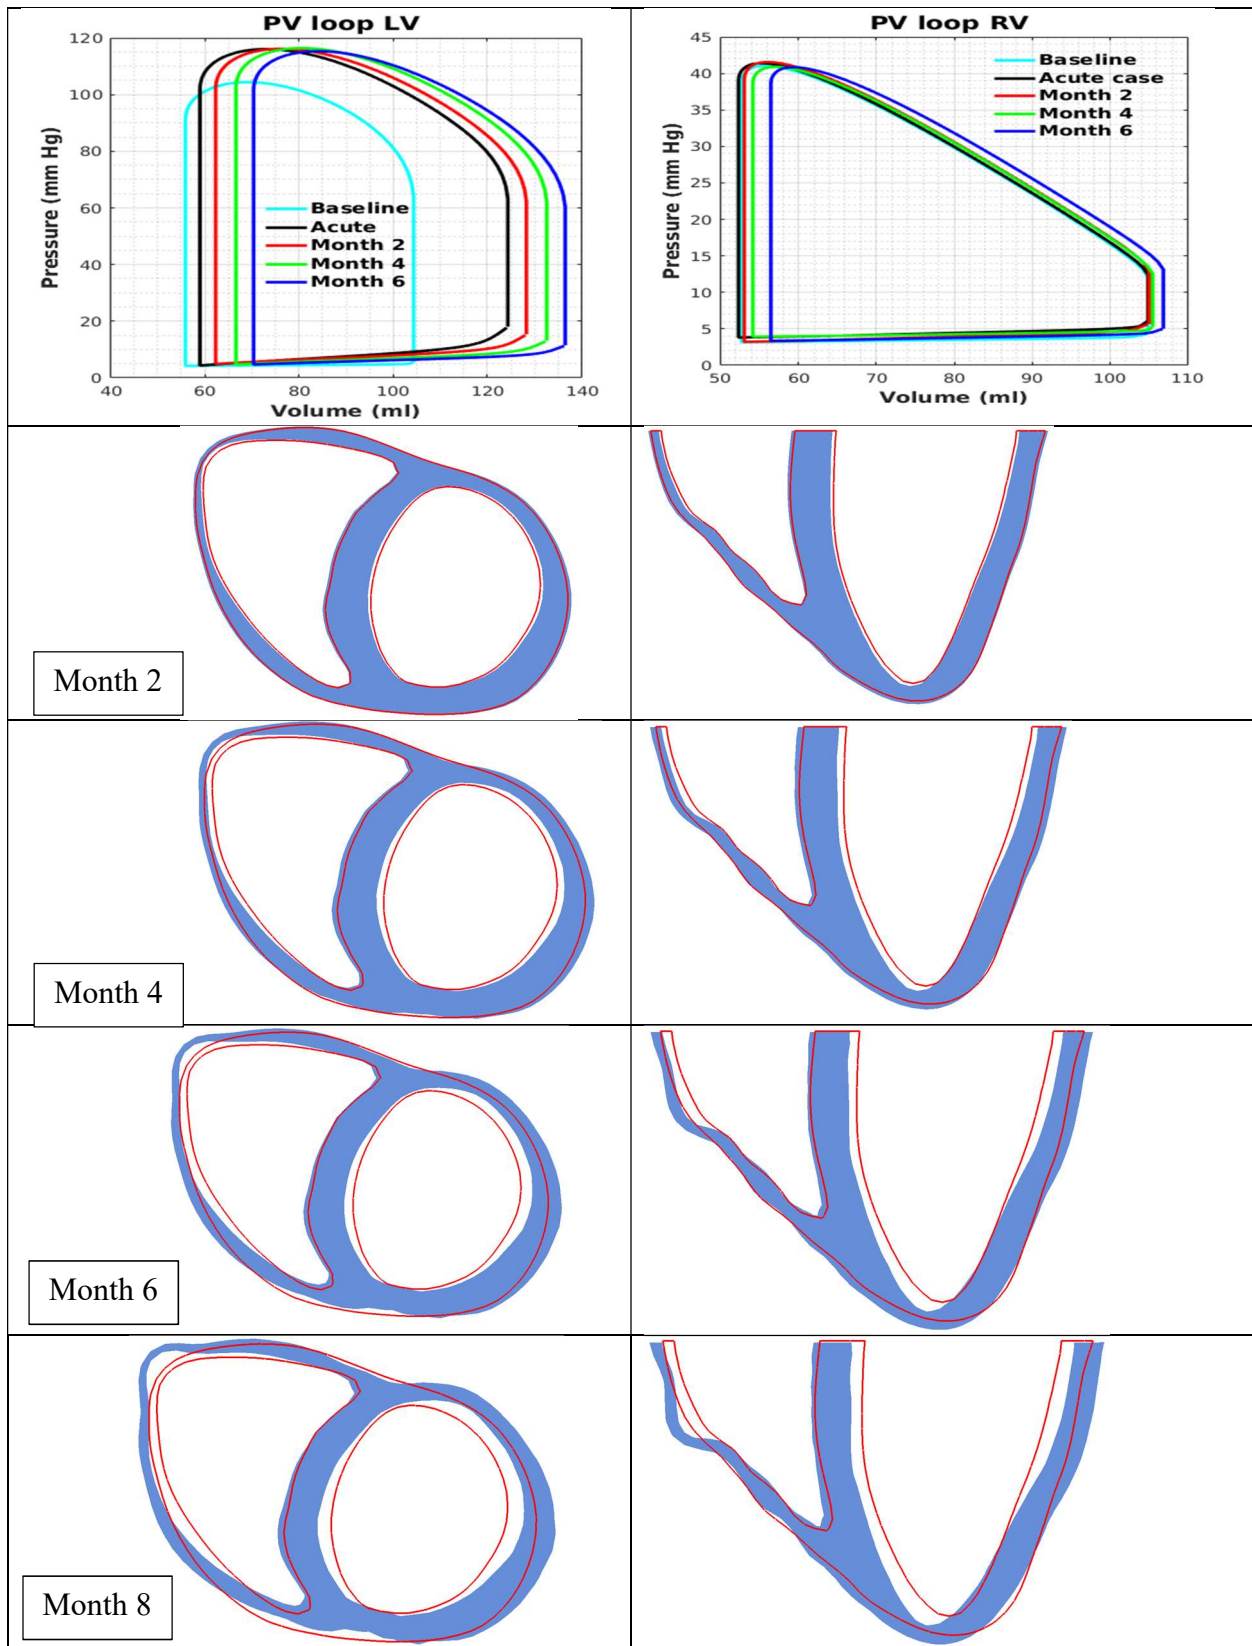

Supplement: 41598_2019_48670_MOESM1_ESM.pdf [file 41598_2019_48670_MOESM1_ESM.pdf]
